# Supplementary material for: Guanidium-assisted crystallization engineering for highly efficient CsPbI3solar cells
Source: Royal Society of Chemistry journal article supplement (doi:10.1039/d2tc01008a), 2022-01-01
Supplement: d2tc01008a1.pdf [file d2tc01008a1.pdf]

## Supporting Information

### **Guanidium-Assisted Crystallization Engineering for Highly Efficient CsPbI<sub>3</sub> Solar Cells**

*Shuo Wang*<sup>1</sup>, *Youkui Xu*<sup>1</sup>, *Qian Wang*<sup>1,\*</sup>, *Xufeng Zhou*<sup>2</sup>, *ZhenHua Li*<sup>3,\*</sup>, *Meng Wang*<sup>1</sup>, *Yutian Lei*<sup>1</sup>, *Hong Zhang*<sup>4</sup>, *Haoxu Wang*<sup>5</sup> and *Zhiwen Jin*<sup>1</sup>

Dr. S. Wang, Dr. Y. Xu, Dr. M. Wang, Dr. Y. Lei, Prof. Q. Wang, Prof. Z. Jin

<sup>1</sup>School of Physical Science and Technology & Key Laboratory for Magnetism and Magnetic Materials of the Ministry of Education, Lanzhou University, Lanzhou 730000, China

Dr. X. Zhou

<sup>2</sup>School of Material Science and Engineering, Liaocheng University, Liaocheng 252000, China

Prof. Z.H. Li

<sup>3</sup>School of Physical Science and Technology & Lanzhou Center for Theoretical Physics & Key Laboratory of Theoretical Physics of Gansu Province, Lanzhou University, Lanzhou 730000, China

Dr. H. Zhang

<sup>4</sup>Electron Microscopy Centre of Lanzhou University, School of Materials and Energy, Lanzhou University, Lanzhou 730000, China

Dr. H. Wang

<sup>5</sup>Delft University of Technology, Photovoltaic Materials and Devices Group, Mekelweg 4, 2628 CD Delft, the Netherlands

E-mail: [qianwang@lzu.edu.cn](mailto:qianwang@lzu.edu.cn), [lizhenhua@lzu.edu.cn](mailto:lizhenhua@lzu.edu.cn)

**Keywords:** CsPbI<sub>3</sub>, GA<sup>+</sup>, Hydrogen bond, Defect passivation, Doping

## Experimental Section

### Materials preparation

*Materials preparation:* lead (II) iodide ( $\text{PbI}_2$ , >99.99%), cesium iodide ( $\text{CsI}$ ,  $\geq 99.99\%$ ), Guanidine Hydroiodide (GAI, >97.0%) were purchased from Xi'an Polymer Light Technology corporation. 2,2,7,7-tetrakis (N,N-dimethoxyphenylamine)-9,9'-spirobifluorene (Spiro-OMeTAD) was generously provided by HighChem Company Limited Electronic Materials Department. 4-tert-butylpyridine (TBP), bis (trifluoromethylsulfonyl) imideliithium salt (Li-TFSI), tris(2-(1H-pyrazol-1-yl)-4-tert-butylpyridine) cobalt (III) tri[bis(trifluoromethane)sulfonimide] (FK209), chlorobenzene, hydriodic acid (HI), dimethyl formamide (DMF). All the reagents and chemicals were used as received without further purification.

*DMAI intermediate Synthesis:* Under the condition of ice bath ( $0^\circ\text{C}$ ), DMF (25 ml) was gradually added dropwise to the HI (100 ml) solution, and stirred at 400 rpm for 6 hours. After the stirring is completed, the rotary steaming apparatus is used to collect the precipitate at a temperature of about  $90^\circ\text{C}$ . Followed, it was dissolved in ethanol repeatedly and precipitated with anhydrous ether to obtain a white sample. Then heated in a vacuum oven at  $50^\circ\text{C}$  overnight to form DMAI powder.

*Precursor solution preparation:* The  $\text{GA}_x\text{Cs}_{1-x}\text{PbI}_3$  precursor solution was prepared by dissolving  $\text{PbI}_2$ ,  $\text{CsI}$ , DMAI, GAI in DMF, and stirred it for more than 6 hours to achieve  $\text{GA}_x\text{Cs}_{1-x}\text{PbI}_3$  ( $x=0, 1\%, 3\%, 5\%$ ) with 0.6M.

*HTL solution preparation:* A solution of Spiro-OMeTAD was prepared by dissolving Spiro-OMeTAD powder (72.5mg), a sulfonyl imide (Li-TFSI,  $35\mu\text{L}$ , 520mg Li-TFSI in 1mL acetonitrile), a FK209 ( $29\mu\text{L}$ , 300 mg FK209 in 1 mL acetonitrile) and tert-butyl pyridine (tBP,  $29\mu\text{L}$ ) in 1mL chlorobenzene solution.

### Device fabrication preparation

*Device fabrication preparation:* FTO-coated glass after cleaning was soaked into  $\text{TiCl}_4$  solution for 60 minutes at  $70^\circ\text{C}$ . Then, a one-step program was employed to deposit the perovskite layer, spin-coating at 3000 rpm for 30 seconds. To form the  $\text{GA}_x\text{Cs}_{1-x}\text{PbI}_3$  layer, the substrate was annealed at  $210^\circ\text{C}$  for 10 minutes under a humidity environment ( $\text{RH} = \sim 40\%$ ). A spiro HTL layer was spin-coated on the  $\text{GA}_x\text{Cs}_{1-x}\text{PbI}_3$  layer at 5000rpm for the 30s. Finally, Au was thermally-evaporated on the HTL layer as top electrodes.

### Computational Methods:

The Vienna Ab-initio Simulation Package (VASP) is used to implement the first-principles calculation with the Perdew-Burke-Ernzerhof (PBE) exchange-correlation functional based on the generalized gradient approximation (GGA). The kinetic-energy cut-offs 600 eV and  $3 \times 3 \times 3$  Monkhorst-Pack k-mesh are used in structural relaxation until all the force components decrease to less than  $0.04 \text{ eV}/\text{\AA}$ . The van der Waals interactions corrections is calculated by the zero damping DFT-D3 method of Grimme.

The Gaussian smearing is used with the smearing parameter 0.05 for all the calculations. In the electronic self-consistent calculations, the convergence criteria were set to  $1.0 \times 10^{-6}$  eV with  $7 \times 7 \times 7$  k-mesh before calculations of the band structures along the along high symmetry lines.

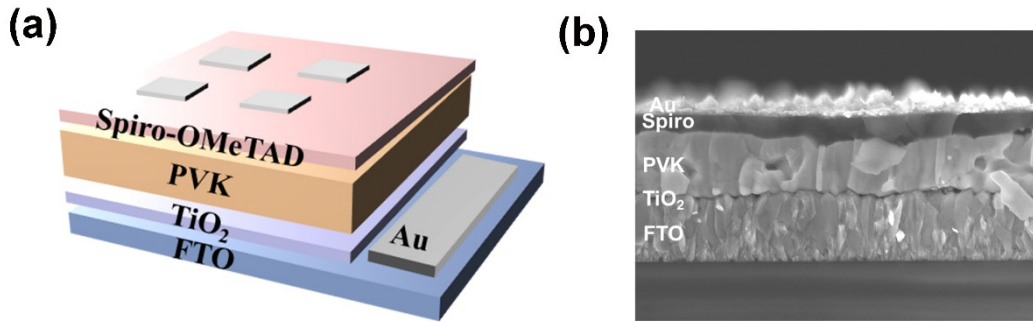

**Figure S1.** (a) Schematic structure and (b) cross-sectional SEM image of the PSCs.

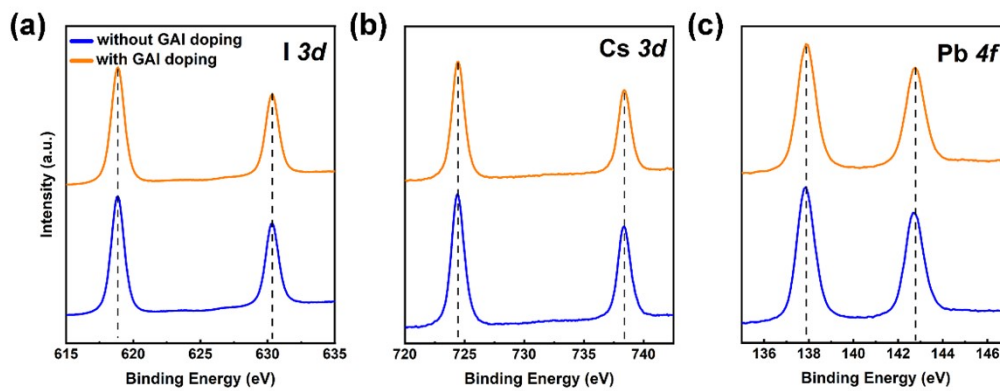

**Figure S2.** Surface XPS spectrum of I 3d, Cs 3d, Pb 4f.

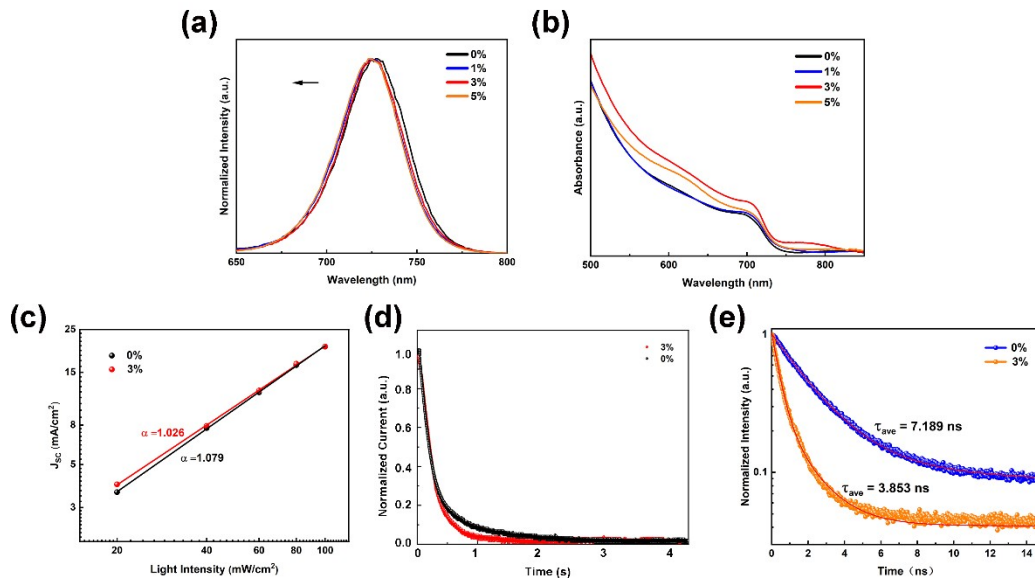

**Figure S3.** Optical properties and charge carrier dynamics based on different molar ratio  $\text{GA}^+ \text{CsPbI}_3$ : (a-b) PL spectra; (c) Absorption image; (d) Photocurrent decay image; (e) Time-resolved PL spectra.

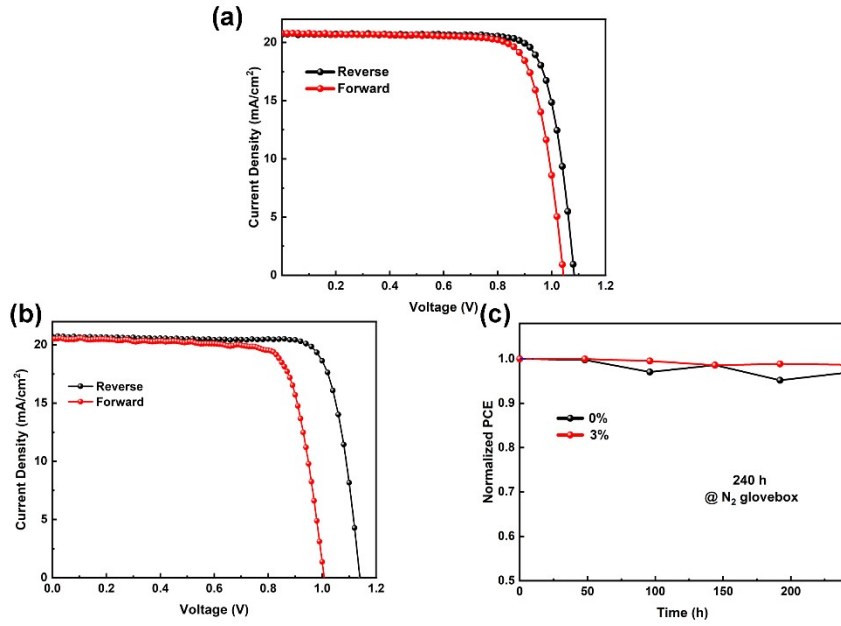

**Figure S4.** (a) J-V curves of reference device (0%) and (b) champion device (3%). (c) environment stability of the resulted devices.

**Table S1.** The photovoltaic parameters of the reference CsPbI<sub>3</sub> PSCs under reverse scan direction and forward scan direction. (Extracted from **Figure S4a**).

| Scan Direction | $J_{SC}$ (mA cm <sup>-2</sup> ) | $V_{oc}$ (V) | FF (%) | PCE (%) |
|----------------|---------------------------------|--------------|--------|---------|
| Reverse        | 20.70                           | 1.08         | 80.30  | 18.01   |
| Forward        | 20.80                           | 1.04         | 78.20  | 16.92   |

**Table S2.** The photovoltaic parameters of the reference CsPbI<sub>3</sub> PSCs with 3% GA<sup>+</sup> doping under reverse scan direction and forward scan direction. (Extracted from **Figure S4b**).

| Scan Direction | $J_{SC}$ (mA cm <sup>-2</sup> ) | $V_{oc}$ (V) | FF (%) | PCE (%) |
|----------------|---------------------------------|--------------|--------|---------|
| Reverse        | 20.70                           | 1.14         | 80.70  | 19.05   |
| Forward        | 20.36                           | 1.06         | 80.03  | 17.25   |
